# Supplementary material for: Specific Incorporation of Polyunsaturated Fatty Acids into the sn-2 Position of Phosphatidylglycerol Accelerates Photodamage to Photosystem II under Strong Light
Source: MDPI journal article supplement (doi:10.3390/ijms221910432), 2021-09-28
Supplement: s1 [file s1]

Supplementaly figure S1

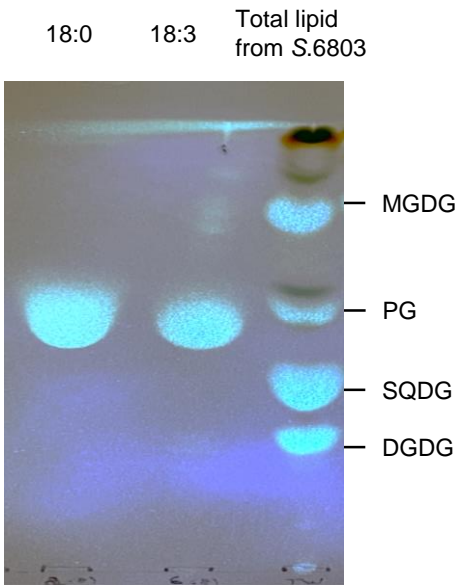

**Figure S1. Position of free fatty acids on TLC developed with chloroform : methanol : 28% NH<sub>4</sub>OH = 65 : 35 : 5 (v/v/v).** 18:0, 18:3 and purified lipids from *Synechocystis* were applied to TLC plate that developed with chloroform : methanol : 28% NH<sub>4</sub>OH = 65 : 35 : 5 (v/v/v). Lipids on TLC plate were visualized by primulin.
